# Supplementary material
Source: PubMed Central journal article supplement (PMC5038024)
Supplement: AEM.01374-16_zam999117448so1.pdf [file AEM.01374-16_zam999117448so1.pdf]

TABLE SI Ingredient and nutrient composition of experimental gestation diets and common lactation diet (as-fed basis)

| Item                             | Gestation diet       |                 | Lactation diet |
|----------------------------------|----------------------|-----------------|----------------|
|                                  | Control <sup>1</sup> | KF <sup>1</sup> |                |
| Ingredient,%                     |                      |                 |                |
| Corn                             | 56.3                 | 54.5            | 54.4           |
| Soybean meal, 43% CP             | 10                   | 10.3            | 26             |
| Wheat bran                       | 30.4                 | 29.7            | 11             |
| <i>Konjac</i> flour <sup>2</sup> | 0                    | 2.2             |                |
| Calcium carbonate                | 1.2                  | 1.2             | 1.51           |
| Dicalcium phosphate              | 1.04                 | 1.04            | 1.23           |
| Salt                             | 0.4                  | 0.4             | 0.26           |
| Mildewcide <sup>3</sup>          | 0.12                 | 0.12            | 0.1            |
| Choline chloride                 | 0.14                 | 0.14            | 1              |
| Premix <sup>4</sup>              | 0.4                  | 0.4             | 1.5            |
| Nutrient composition             |                      |                 |                |
| Net energy,MJ/kg <sup>5</sup>    | 9.32                 | 9.38            | 10.36          |
| Crude protein,%                  | 14.06                | 14.25           | 18.92          |
| ISF, % <sup>6</sup>              | 20.12                | 20.36           | 14.45          |
| SF, % <sup>7</sup>               | 2.38                 | 3.57            | 1.76           |
| NDF, % <sup>8</sup>              | 19.7                 | 20.32           | 11.18          |
| ADF,% <sup>9</sup>               | 5.42                 | 5.58            | 4.26           |
| Lys,% <sup>5</sup>               | 0.61                 | 0.61            | 1.03           |
| Ca, % <sup>5</sup>               | 0.77                 | 0.77            | 1.06           |
| Available P, % <sup>5</sup>      | 0.33                 | 0.32            | 0.45           |

<sup>1</sup>C =control diet group; KF=2.2% *konjac* flour diet group.

<sup>2</sup>*Konjac* flour contains 8% crude protein, 10.81% insoluble fiber, 61.03% soluble fiber, 48.66% NDF and 3.76% ADF.

<sup>3</sup>Mildewcide: ammonium propionate.

<sup>4</sup> Provided per kg of diet: Cu 30 mg; Fe 160 mg; Zn 160 mg; Mn 55 mg; I 0.5mg; Se 0.5; Co 0.8mg; Cr 0.2mg; Vitamin A 14000 IU; Vitamin D<sub>3</sub> 2900 IU; Vitamin E 120 mg; Vitamin K<sub>3</sub> 6mg; Vitamin B<sub>1</sub> 2.4 mg; Vitamin B<sub>2</sub> 8.5mg; Vitamin B<sub>6</sub> 4.5 mg; Vitamin B<sub>12</sub> 0.03 mg; Vitamin H 0.55mg; Pantothenic acid 30mg; Folic acid 5mg; Nicotinamide 50mg.

<sup>5</sup>Calculated chemical concentrations using values for feed ingredients from the NRC (1998).

<sup>6</sup>insoluble fiber.

<sup>7</sup>solubel fiber.

<sup>8</sup>neutral detergent fiber.

<sup>9</sup>acid detergent fiber.

TABLE S2 Raw reads, valid sequences reads and valid ratio (%) from four groups

| Group               | Raw reads | High quality sequences | Valid ratio (%) |
|---------------------|-----------|------------------------|-----------------|
| Control             | 25,036    | 19,862                 | 80.80           |
| <i>Konjac</i> flour | 19,483    | 16,092                 | 86.11           |
| Gestation           | 22,155    | 17,977                 | 83.45           |
| Lactation           | 25,172    | 19,310                 | 77.17           |
